# Supplementary material for: The fate of O2 in photocatalytic CO2 reduction on TiO2 under conditions of highest purity
Source: Royal Society of Chemistry journal article supplement (doi:10.1039/c8cp07765g), 2019-01-01
Supplement: c8cp07765g5.pdf [file c8cp07765g5.pdf]

## Supporting Information

### The Fate of O<sub>2</sub> in Photocatalytic CO<sub>2</sub> Reduction on TiO<sub>2</sub> under Conditions of Highest Purity

Martin Dilla,<sup>a</sup> Alina Jakubowski,<sup>a</sup> Simon Ristig,<sup>\*a</sup> Jennifer Strunk<sup>\*b</sup> and Robert Schlögl<sup>a,c</sup>

<sup>a</sup> Max Planck Institute for Chemical Energy Conversion, 45470 Mülheim an der Ruhr, Germany.

<sup>b</sup> Leibniz Institute for Catalysis, 18059 Rostock, Germany.

<sup>c</sup> Fritz Haber Institute of the Max Planck Society, 14195 Berlin, Germany.

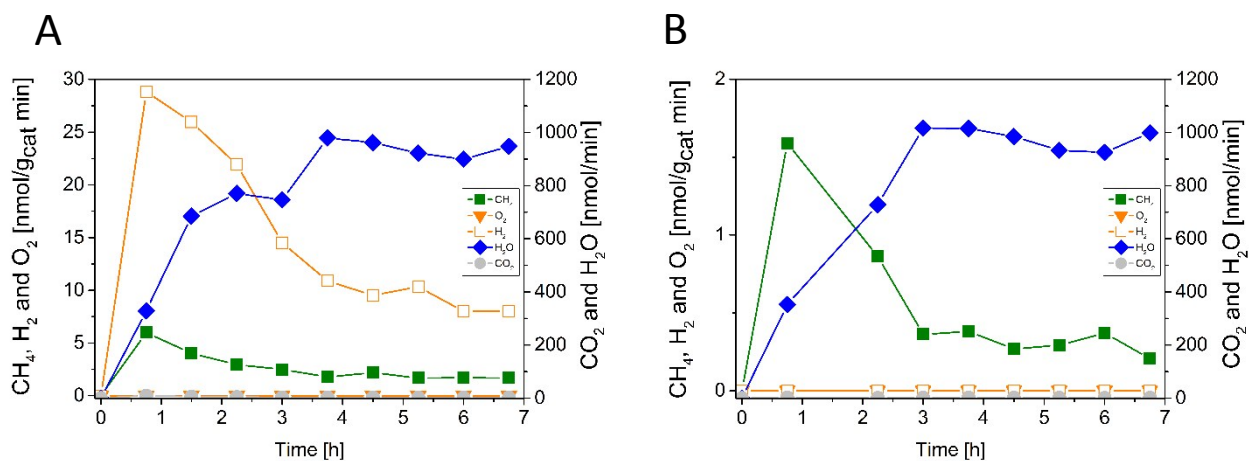

Figure S11: Photocatalytic H<sub>2</sub>O splitting with A: 0.05 wt.-% CoO<sub>x</sub>/P25 calcined at 200 °C. B: 0.05 wt.-% CoO<sub>x</sub>/P25 sample calcined at 400 °C. Irradiation time: 6.75 h. Lines are included in order to guide the eye.

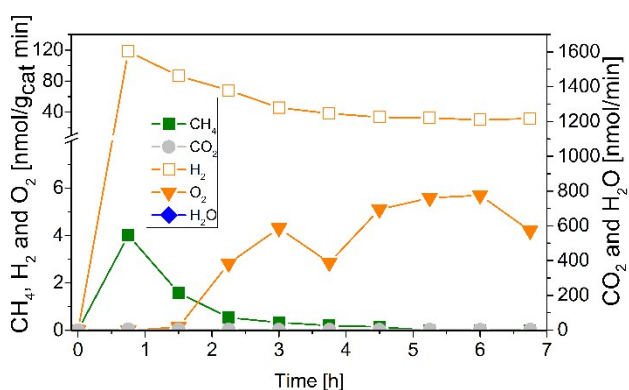

Figure S12: Photocatalytic H<sub>2</sub>O splitting and cleaning with 0.05 wt.-% IrO<sub>x</sub>/P25 calcined at 200 °C. Irradiation time: 6.75 h. Lines are included in order to guide the eye.

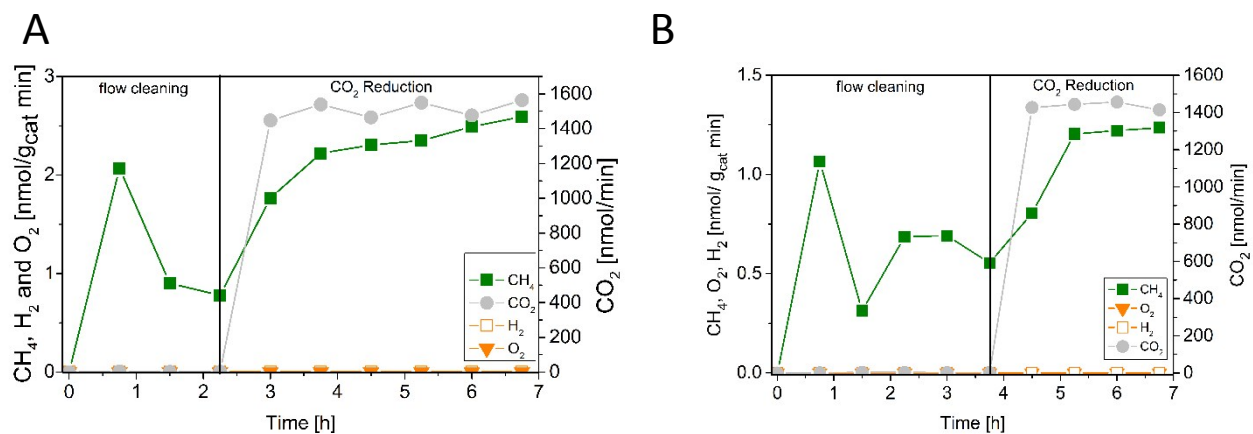

Figure S13: Photocatalytic CO<sub>2</sub> reduction with A: P25 reference sample calcined at 200 °C (flow cleaning from 0 to 2.25 h, CO<sub>2</sub> reduction from 2.25 h to 6.75 h, ~25 nmol/min H<sub>2</sub>O dosing from 0 to 6.75 h) and B: P25 reference sample calcined at 400 °C (flow cleaning from 0 to 3.75 h, CO<sub>2</sub> reduction from 3.75 h to 6.75 h, ~25 nmol/min H<sub>2</sub>O dosing from 0 to 6.75 h). Lines are included in order to guide the eye.
