# Supplementary figures and images for: The fate of O2 in photocatalytic CO2 reduction on TiO2 under conditions of highest purity
Source: Royal Society of Chemistry journal article supplement (doi:10.1039/c8cp07765g), 2019-01-01

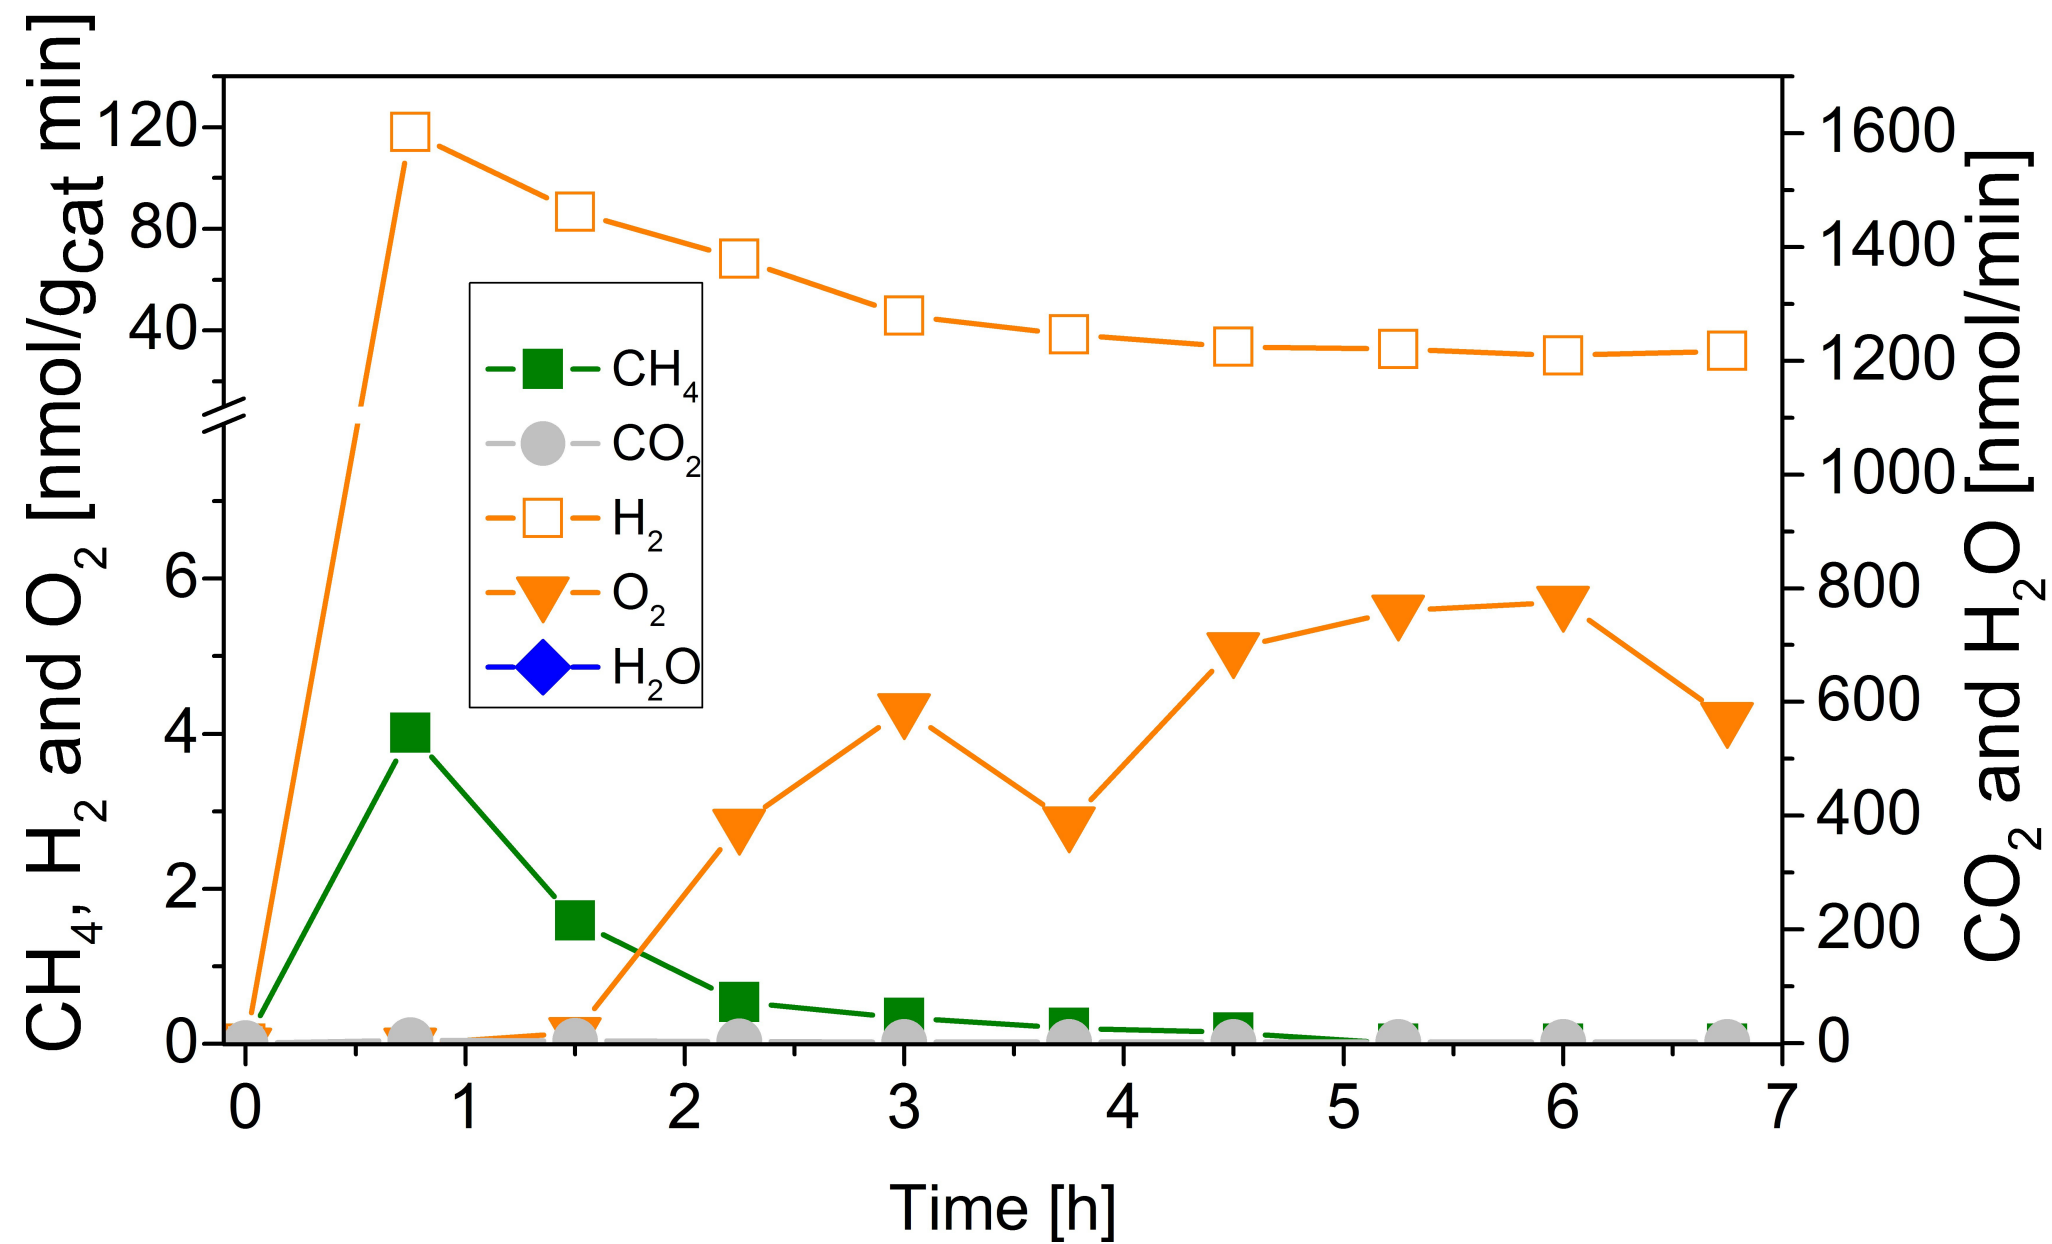

Supplement: c8cp07765g3.pdf [file c8cp07765g3.pdf]
